# Supplementary material for: Circulating fibroblast growth factor-2 precipitates HIV nephropathy in mice
Source: PubMed Central journal article supplement (PMC8326767; doi:10.1242/dmm.048980), 2021-07-26
Supplement: dmm-14-048980-s1.pdf [file dmm-14-048980-s1.pdf]

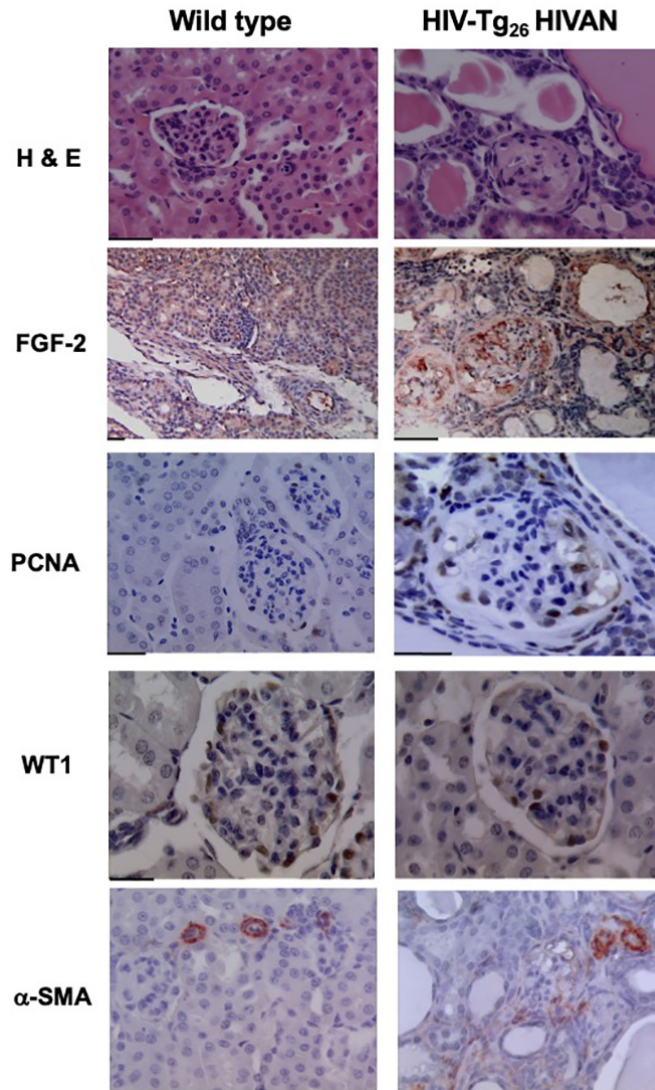

**Fig S1. HIVAN associated nephropathy (HIVAN) in HIV-Tg<sub>26</sub> mice.** The panels show representative renal sections from wild type and HIV-Tg<sub>26</sub> mice which developed HIVAN spontaneously. Renal sections were stained with hematoxylin and eosin (H&E), or processed for immunohistochemistry studies to detect Fibroblast Growth Factor-2 (FGF-2), Proliferating Cell Nuclear Antigen (PCNA), Wilms Tumor 1 antigen (WT1), and  $\alpha$ -smooth muscle actin ( $\alpha$ -SMA) as described in Material and Methods. Renal sections from HIV-Tg<sub>26</sub> mice with HIVAN showed glomerular sclerotic lesions with microcystic tubular dilatation and casts, recruitment of FGF-2 in

renal glomeruli and tubulo-interstitium (red color), several glomerular and tubular epithelial PCNA+ cells (brown color), few WT1+ cells in renal glomeruli (brown color), and recruitment of  $\alpha$ -SMA + cells in the tubulo-interstitium (red color). Renal vessels from wild type and HIV-Tg<sub>26</sub> mice also stained positive for  $\alpha$ -SMA. Scale bars: 20  $\mu$ m. (n = 5 mice per group).
